# Supplementary material for: Fluorinated liquid-enabled protein handling and surfactant-aided crystallization for fully in situ digital microfluidic MALDI-MS analysis
Source: Royal Society of Chemistry journal article supplement (doi:10.1039/c2lc21135a), 2012-01-01
Supplement: c2lc21135a.pdf [file c2lc21135a.pdf]

*Lab on a Chip 2012*  
Electronic Supplementary Information

**Fluorinated liquid enabled digital microfluidic protein handling for fully in-situ MALDI-MS analysis with surfactant aided crystallization**

**Andrew P. Aijian,<sup>\*,a</sup> Debalina Chatterjee<sup>a,b</sup> and Robin L. Garrell<sup>b</sup>**

<sup>a</sup> Biomedical Engineering Interdepartmental PhD Program, University of California, Los Angeles, CA 90095-1600, USA

<sup>b</sup> Department of Chemistry and Biochemistry, University of California, Los Angeles, CA 90095-1569, USA

<sup>c</sup> California NanoSystems Institute(CNSI), University of California, Los Angeles, CA 90095-7227, USA.

E-mail: [garrell@chem.ucla.edu](mailto:garrell@chem.ucla.edu); Tel: +1 310-825-4383

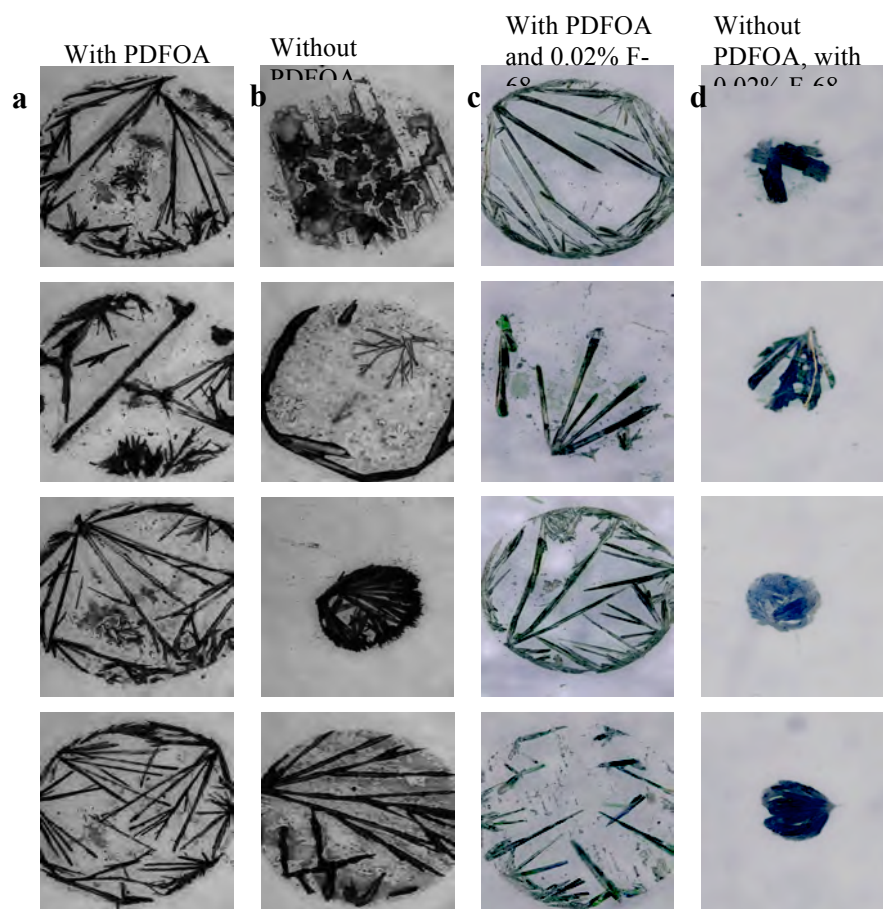

**Figure S1.** A comparison of typical crystal morphology for digested FITC-BSA samples crystallized on Cytop with (a) and without (b) PDFOA in the matrix solution. Samples of digested FITC-BSA containing 0.02% Pluronic® F-68 crystallized on Cytop with (c) and without (d) PDFOA in the matrix. All samples crystallized with PDFOA exhibited the typical crystal structure of long, needle-like crystals originating from the outer rim of the spot. Samples crystallized without PDFOA exhibited unpredictable crystal structure. Samples crystallized without PDFOA but with 0.02% F-68 consistently formed compact crystal clusters.

All mass spectra were acquired from a Voyager DE-STR Mass Spectrometer from Applied Biosciences. The instrument settings for all spectra acquired were as follows:

Mode of operation: Reflector  
Extraction mode: Delayed  
Polarity: Positive  
Acquisition control: Manual

Accelerating voltage: 20000V  
Grid Voltage: 66%  
Mirror voltage ratio: 1.12  
Guide wire 0: 0%  
Extraction delay time: 170 nsec

Laser intensity: 2716 – 2866  
Laser Rep Rate: 20.0 Hz  
Calibration matrix: 2,5-Dihydroxybenzoic acid  
Timed ion selector: Off

TIS gate width: 30  
TIS flight length: 1167

Prior to analysis by MASCOT, all spectra were modified in the Data Explorer™ (Applied Biosystems) according to the following modifications:

Gaussian Smooth: 7 points  
Baseline Correction: yes  
Peak insertion: when necessary

All spectra were internally calibrated using either a peptide standard, trypsin autolysis peak, or both.

Below are the mass spectra used in figures 7a, 7b, and 6, respectively. The peptides identified by MASCOT are listed along with the MOWSE score and protein identification.

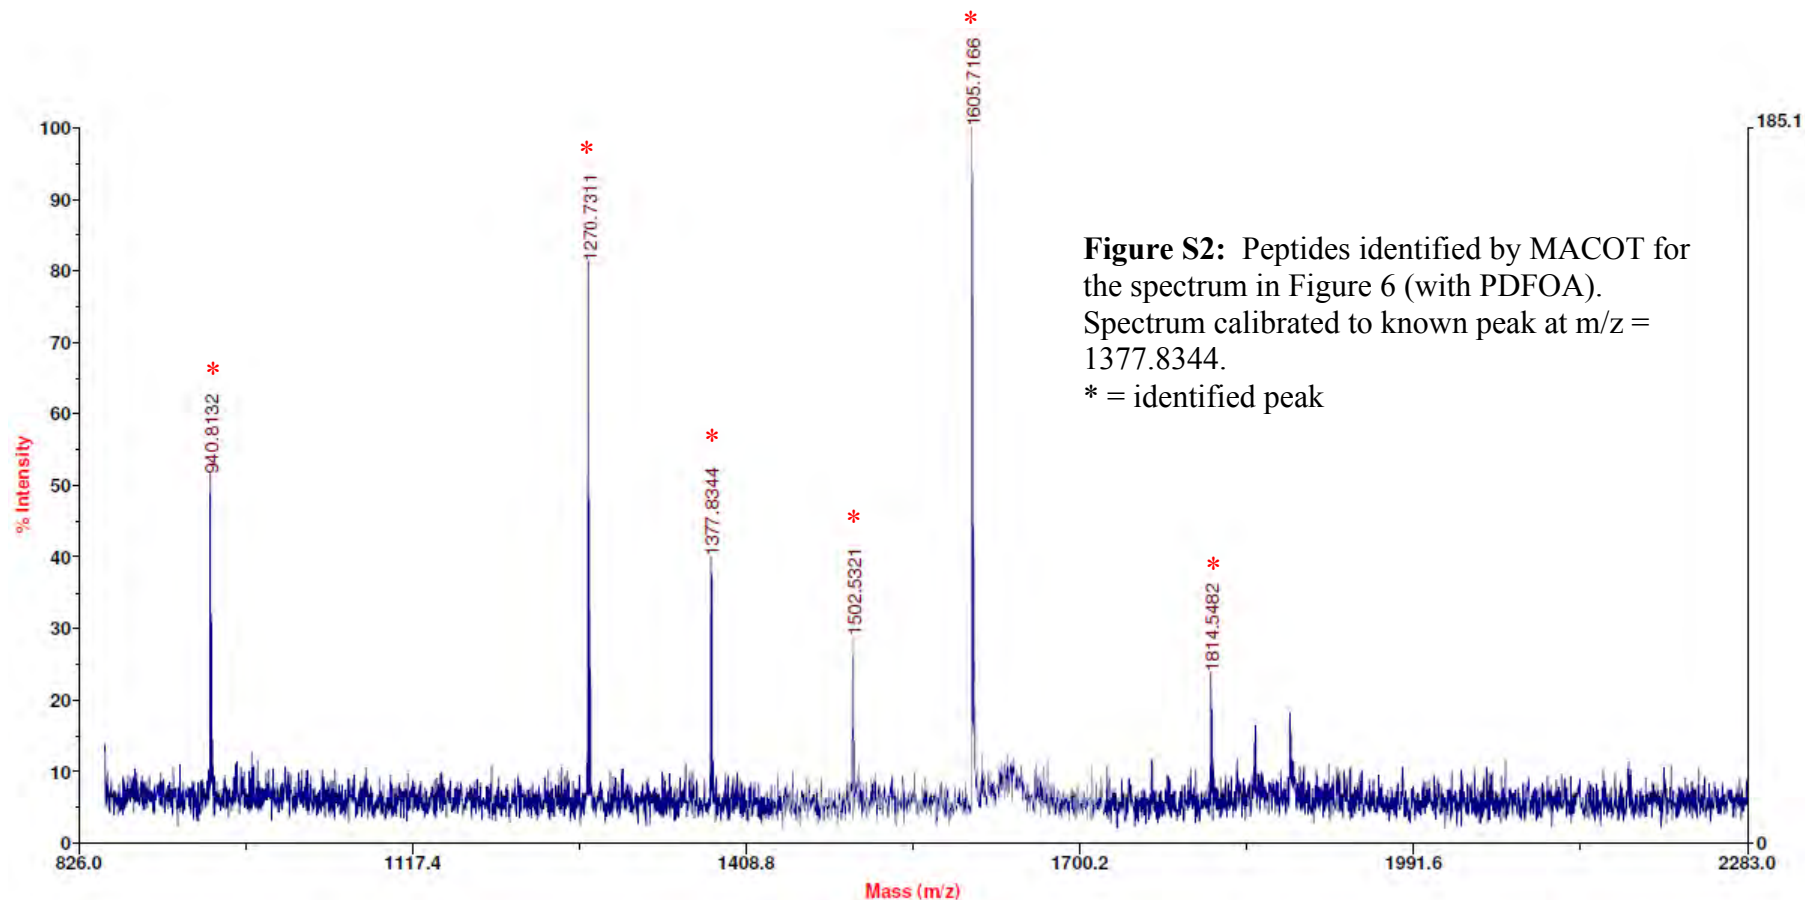

**Figure S2:** Peptides identified by MACOT for the spectrum in Figure 6 (with PDFOA).  
 Spectrum calibrated to known peak at  $m/z = 1377.8344$ .  
 \* = identified peak

| Start - End | Observed  | Mr (expt) | Mr (calc) | ppm  | Miss | Sequence             |
|-------------|-----------|-----------|-----------|------|------|----------------------|
| 2 - 17      | 1814.5482 | 1814.5482 | 1814.8952 | -191 | 0    | M.GLSDGEWQQVLNVWGK.V |
| 18 - 32     | 1605.7166 | 1605.7166 | 1605.8475 | -81  | 0    | K.VEADIAGHGQEVLR.L   |
| 33 - 43     | 1270.7311 | 1270.7311 | 1270.6557 | 59   | 0    | R.LFTGHPETLEK.F      |
| 65 - 78     | 1377.8344 | 1377.8344 | 1377.8344 | 0    | 0    | K.HGTVVLTALGGILK.K   |
| 120 - 134   | 1501.5314 | 1501.5314 | 1501.6620 | -87  | 0    | K.HPGDFGADAQGAMTK.A  |
| 147 - 154   | 940.8132  | 940.8132  | 940.4654  | 370  | 1    | K.YKELGFQG.-         |

Match to: MYG\_EQUBU Score: 110 Expect: 5.3e-06

Myoglobin OS=Equus burchelli GN=MB PE=1 SV=2

Nominal mass (Mr): 17072; Calculated pI value: 7.21

NCBI BLAST search of MYG\_EQUBU against nr

Unformatted sequence string for pasting into other applications

Taxonomy: Equus burchellii

Cleavage by Trypsin: cuts C-term side of KR unless next residue is P

Number of mass values searched: 6

Number of mass values matched: 6

Sequence Coverage: 51%

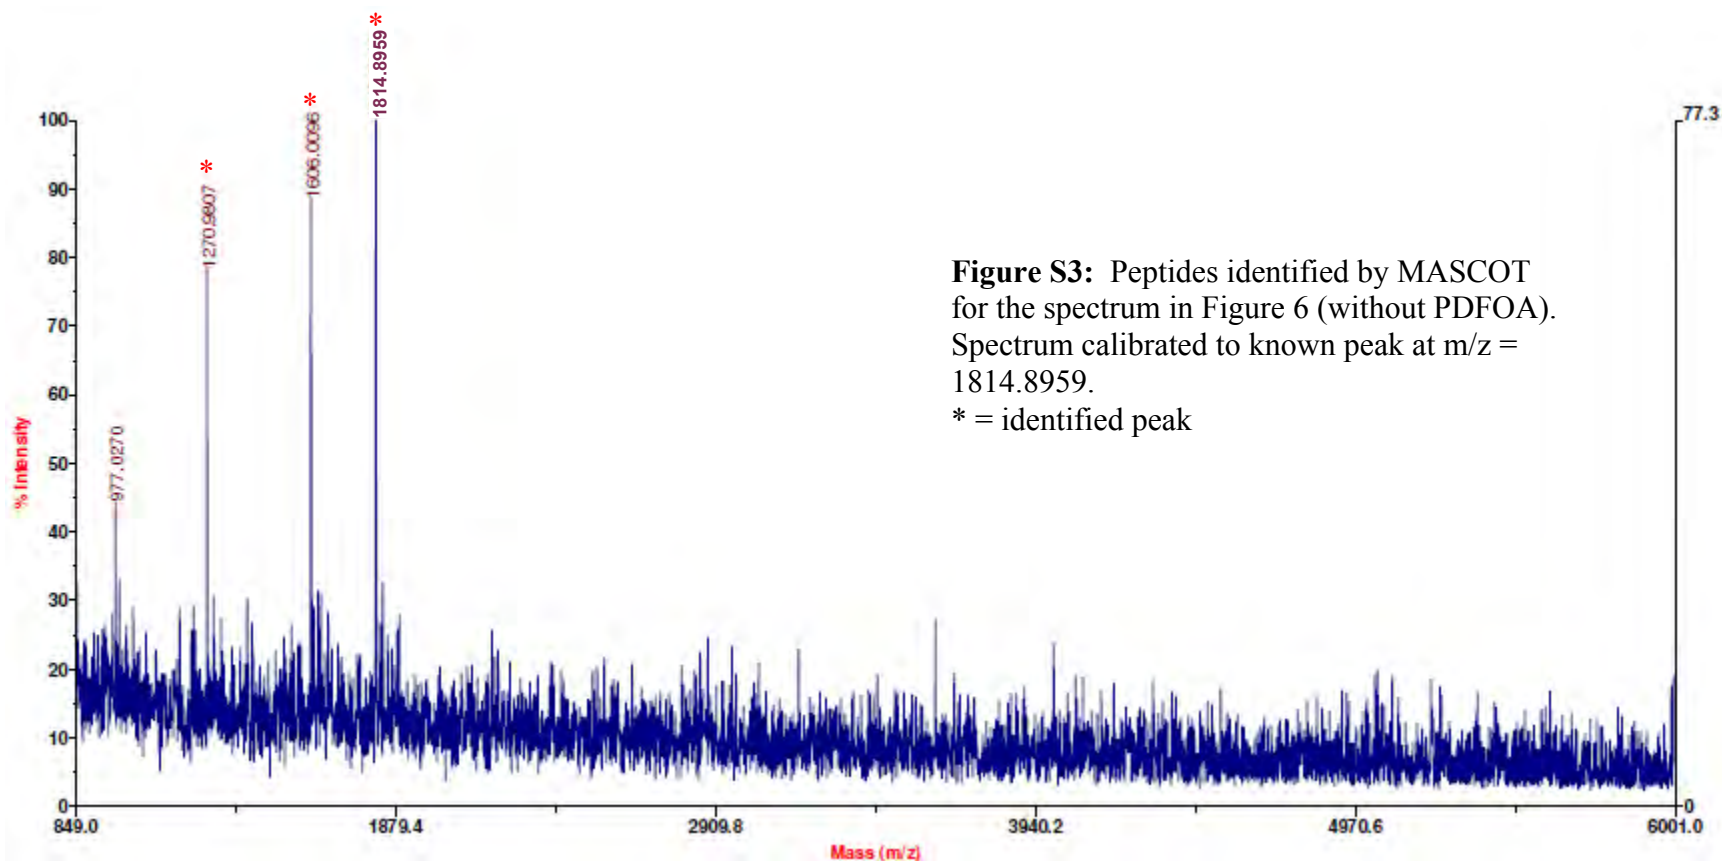

**Figure S3:** Peptides identified by MASCOT for the spectrum in Figure 6 (without PDFOA). Spectrum calibrated to known peak at  $m/z = 1814.8959$ .  
 \* = identified peak

| Start - End | Observed  | Mr (expt) | Mr (calc) | ppm | Miss | Sequence              |
|-------------|-----------|-----------|-----------|-----|------|-----------------------|
| 2 - 17      | 1814.8959 | 1814.8959 | 1814.8952 | 0   | 0    | M.GLSDGEWQQVNLNVWGK.V |
| 18 - 32     | 1606.0096 | 1606.0096 | 1605.8475 | 101 | 0    | K.VEADIAGHGQEVLR.L    |
| 33 - 43     | 1270.9807 | 1270.9807 | 1270.6557 | 256 | 0    | R.LFTGHPETLEK.F       |

Match to: MYG\_EQUBU Score: 58 Expect: 0.83  
 Myoglobin OS=Equus burchelli GN=MB PE=1 SV=2  
 Nominal mass (Mr): 17072; Calculated pI value: 7.21  
 NCBI BLAST search of MYG\_EQUBU against nr  
 Unformatted sequence string for pasting into other applications  
 Taxonomy: Equus burchelli  
 Cleavage by Trypsin: cuts C-term side of KR unless next residue is P  
 Number of mass values searched: 3  
 Number of mass values matched: 3  
 Sequence Coverage: 27%

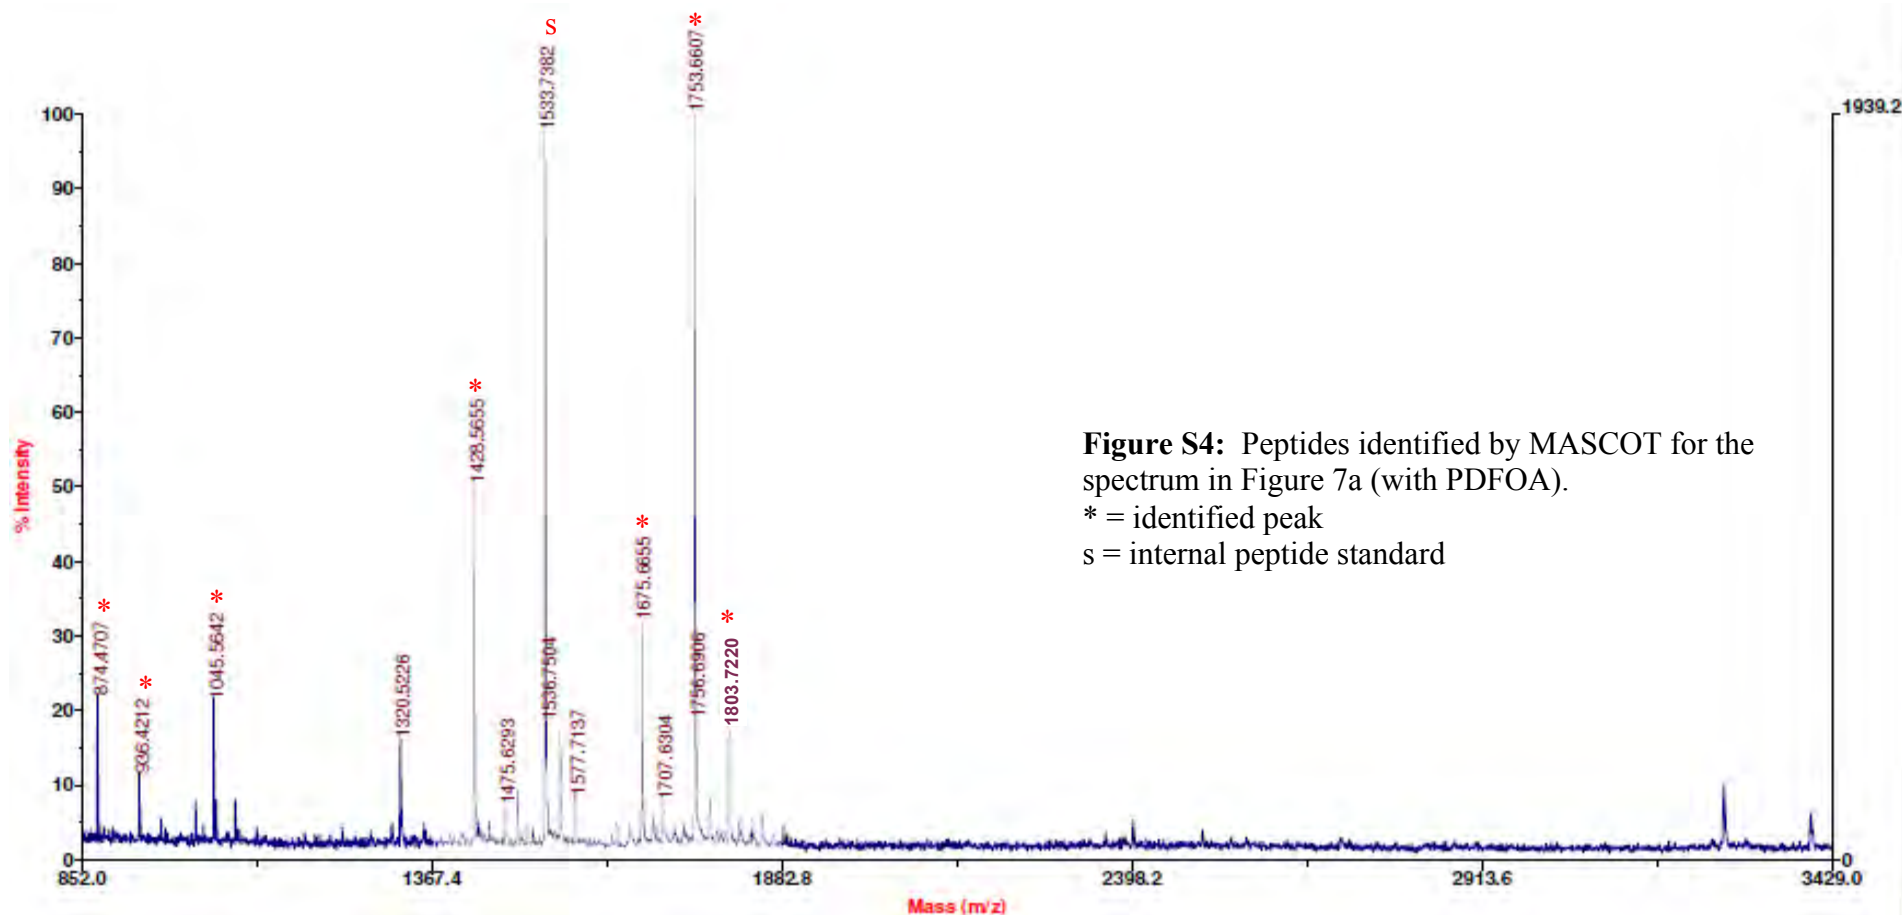

| Start - End | Observed  | Mr (expt) | Mr (calc) | ppm | Miss | Sequence             |
|-------------|-----------|-----------|-----------|-----|------|----------------------|
| 33 - 39     | 874.4707  | 873.4635  | 873.4093  | 62  | 0    | R.HGLDNYR.G          |
| 52 - 63     | 1428.5655 | 1427.5582 | 1427.6429 | -59 | 0    | K.FESNFNTQATNR.N     |
| 64 - 79     | 1753.6607 | 1752.6535 | 1752.8278 | -99 | 0    | R.NTDGSTDYGILQINSR.W |
| 80 - 86     | 936.4212  | 935.4139  | 935.3708  | 46  | 0    | R.WWCNDGR.T          |
| 115 - 130   | 1803.7220 | 1802.7148 | 1802.8886 | -96 | 1    | K.KIVSDGNGMNAWVAWR.N |
| 116 - 130   | 1675.6655 | 1674.6582 | 1674.7937 | -81 | 0    | K.IVSDGNGMNAWVAWR.N  |
| 135 - 143   | 1045.5642 | 1044.5569 | 1044.5352 | 21  | 0    | K.GTDVQAWIR.G        |

Match to: LYSC\_CHICK Score: 155 Expect: 1.7e-10

Lysozyme C OS=Gallus gallus GN=LYZ PE=1 SV=1

Nominal mass (Mr): 16228; Calculated pI value: 9.37

NCBI BLAST search of LYSC\_CHICK against nr

Unformatted sequence string for pasting into other applications

Taxonomy: Gallus gallus

Cleavage by Trypsin: cuts C-term side of KR unless next residue is P

Number of mass values searched: 7

Number of mass values matched: 7

Sequence Coverage: 45%

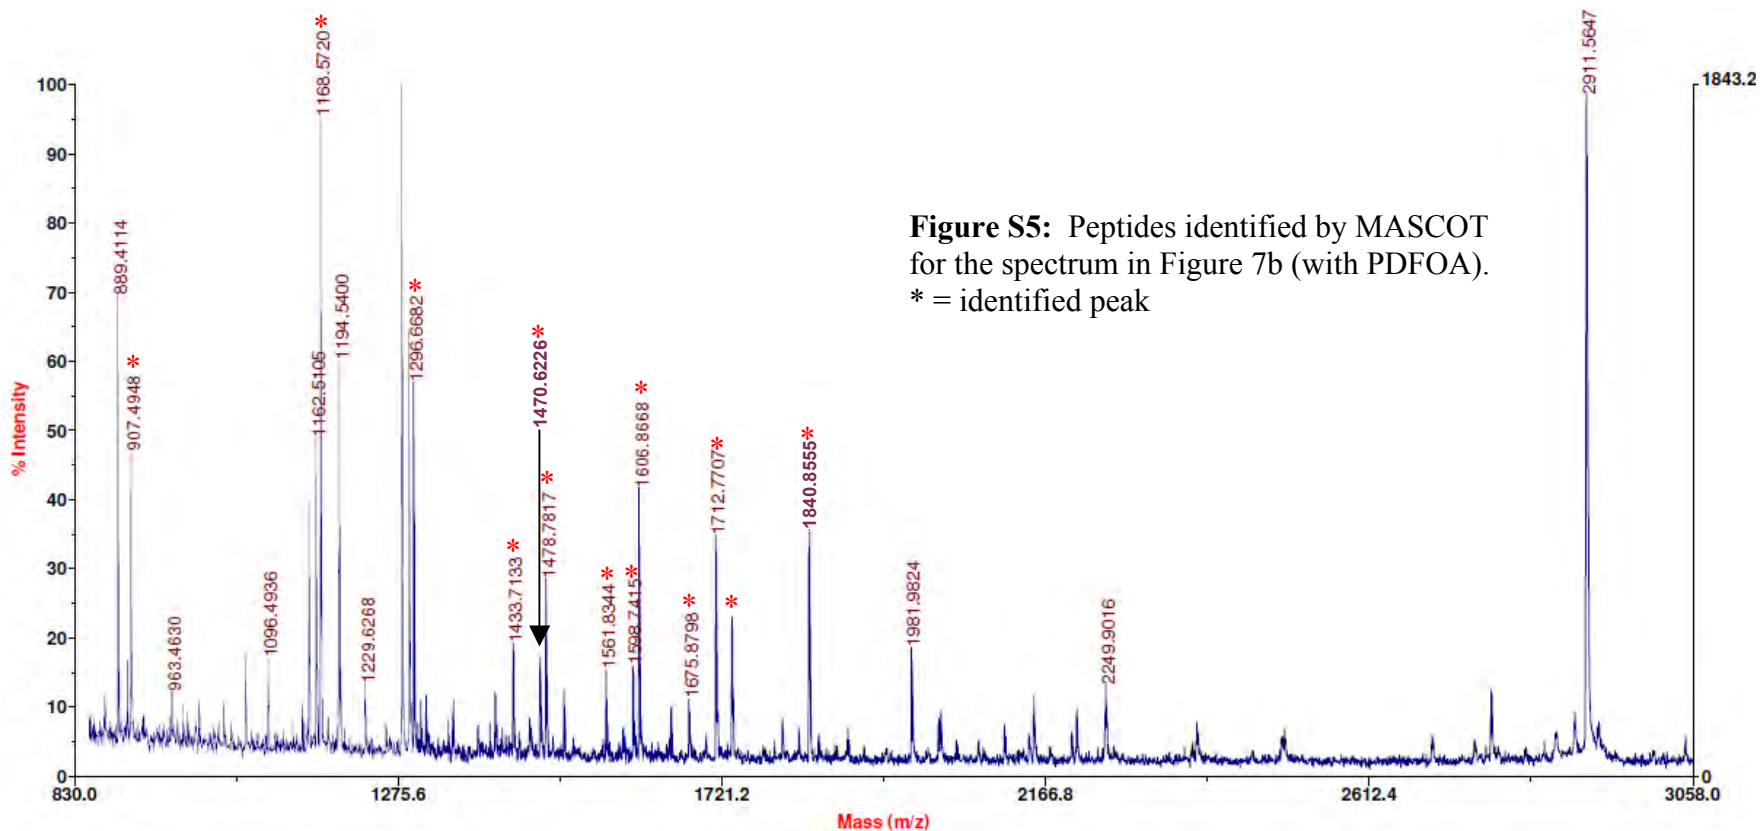

**Figure S5:** Peptides identified by MASCOT for the spectrum in Figure 7b (with PDFOA).  
 \* = identified peak

| Start - End | Observed  | Mr (expt) | Mr (calc) | ppm | Miss | Sequence                  |
|-------------|-----------|-----------|-----------|-----|------|---------------------------|
| 1 - 14      | 1606.8668 | 1605.8595 | 1605.8912 | -20 | 3    | - .MGDVEKGKKLIFVQK . C    |
| 24 - 39     | 1675.8798 | 1674.8725 | 1674.9067 | -20 | 2    | K .GGKHKTGPNLHGLFGR . K   |
| 27 - 39     | 1433.7133 | 1432.7060 | 1432.7688 | -44 | 1    | K .HKTGPNLHGLFGR . K      |
| 27 - 40     | 1561.8344 | 1560.8271 | 1560.8637 | -23 | 2    | K .HKTGPNLHGLFGRK . T     |
| 29 - 39     | 1168.5720 | 1167.5647 | 1167.6149 | -43 | 0    | K .TGPNLHGLFGR . K        |
| 29 - 40     | 1296.6682 | 1295.6609 | 1295.7099 | -38 | 1    | K .TGPNLHGLFGRK . T       |
| 40 - 54     | 1598.7415 | 1597.7342 | 1597.7736 | -25 | 1    | R .KTGQAPGFITYTDANK . N   |
| 40 - 56     | 1840.8555 | 1839.8482 | 1839.9115 | -34 | 2    | R .KTGQAPGFITYTDANKNK . G |
| 41 - 54     | 1470.6226 | 1469.6153 | 1469.6787 | -43 | 0    | K .TGQAPGFITYTDANK . N    |
| 41 - 56     | 1712.7707 | 1711.7634 | 1711.8166 | -31 | 1    | K .TGQAPGFITYTDANKNK . G  |
| 81 - 88     | 907.4948  | 906.4875  | 906.5361  | -54 | 1    | K .MIFAGIKK . K           |
| 88 - 101    | 1734.9427 | 1733.9354 | 1734.0039 | -39 | 4    | K .KKTEREDLIAYLKK . A     |
| 90 - 101    | 1478.7817 | 1477.7744 | 1477.8140 | -27 | 2    | K .TEREDLIAYLKK . A       |

Match to: **CYC\_HORSE** Score: 224 Expect: 2.1e-17  
 Cytochrome c OS=Equus caballus GN=CYCS PE=1 SV=2  
 Nominal mass (Mr): 11825; Calculated pI value: 9.59  
 NCBI BLAST search of CYC\_HORSE against nr  
 Unformatted sequence string for pasting into other applications

Taxonomy: Equus caballus  
 Cleavage by Trypsin: cuts C-term side of KR unless next residue is P  
 Number of mass values searched: 13  
 Number of mass values matched: 13  
 Sequence Coverage: 64%

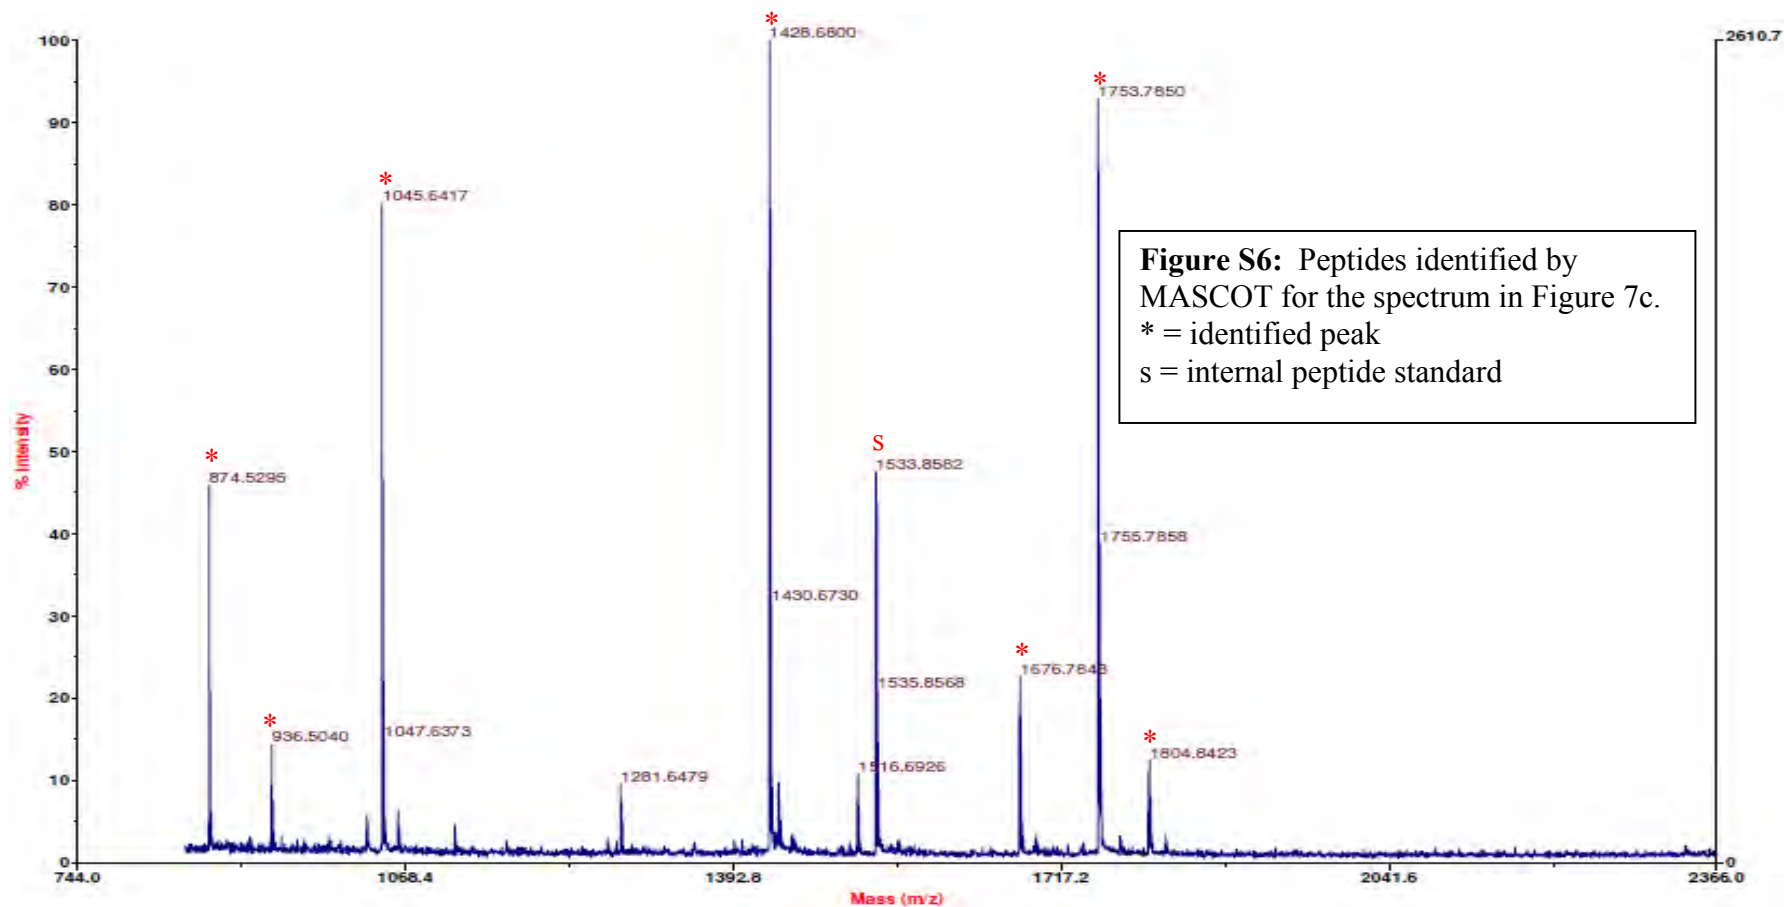

**Figure S6:** Peptides identified by MASCOT for the spectrum in Figure 7c.  
 \* = identified peak  
 s = internal peptide standard

| Start - End | Observed  | Mr (expt) | Mr (calc) | ppm | Miss | Sequence             |
|-------------|-----------|-----------|-----------|-----|------|----------------------|
| 33 - 39     | 874.5295  | 873.5222  | 873.4093  | 129 | 0    | R.HGLDNYR.G          |
| 52 - 63     | 1428.6800 | 1427.6727 | 1427.6429 | 21  | 0    | K.FESNFNTQATNR.N     |
| 64 - 79     | 1753.7850 | 1752.7777 | 1752.8278 | -29 | 0    | R.NTDGSTDYGILQINSR.W |
| 80 - 86     | 936.5040  | 935.4967  | 935.3708  | 135 | 0    | R.WWCNDGR.T          |
| 115 - 130   | 1803.8526 | 1802.8453 | 1802.8886 | -24 | 1    | K.KIVSDGNGMNAWVAWR.N |
| 116 - 130   | 1675.7971 | 1674.7898 | 1674.7937 | -2  | 0    | K.IVSDGNGMNAWVAWR.N  |
| 135 - 143   | 1045.6417 | 1044.6344 | 1044.5352 | 95  | 0    | K.GTDVQAWIR.G        |

Match to: LYSC\_CHICK Score: 151 Expect: 4.2e-10  
 Lysozyme C OS=Gallus gallus GN=LYZ PE=1 SV=1  
 Nominal mass (Mr): 16228; Calculated pI value: 9.37  
 NCBI BLAST search of LYSC\_CHICK against nr  
 Unformatted sequence string for pasting into other applications

Taxonomy: Gallus gallus  
 Cleavage by Trypsin: cuts C-term side of KR unless next residue is P  
 Number of mass values searched: 7  
 Number of mass values matched: 7  
 Sequence Coverage: 45%

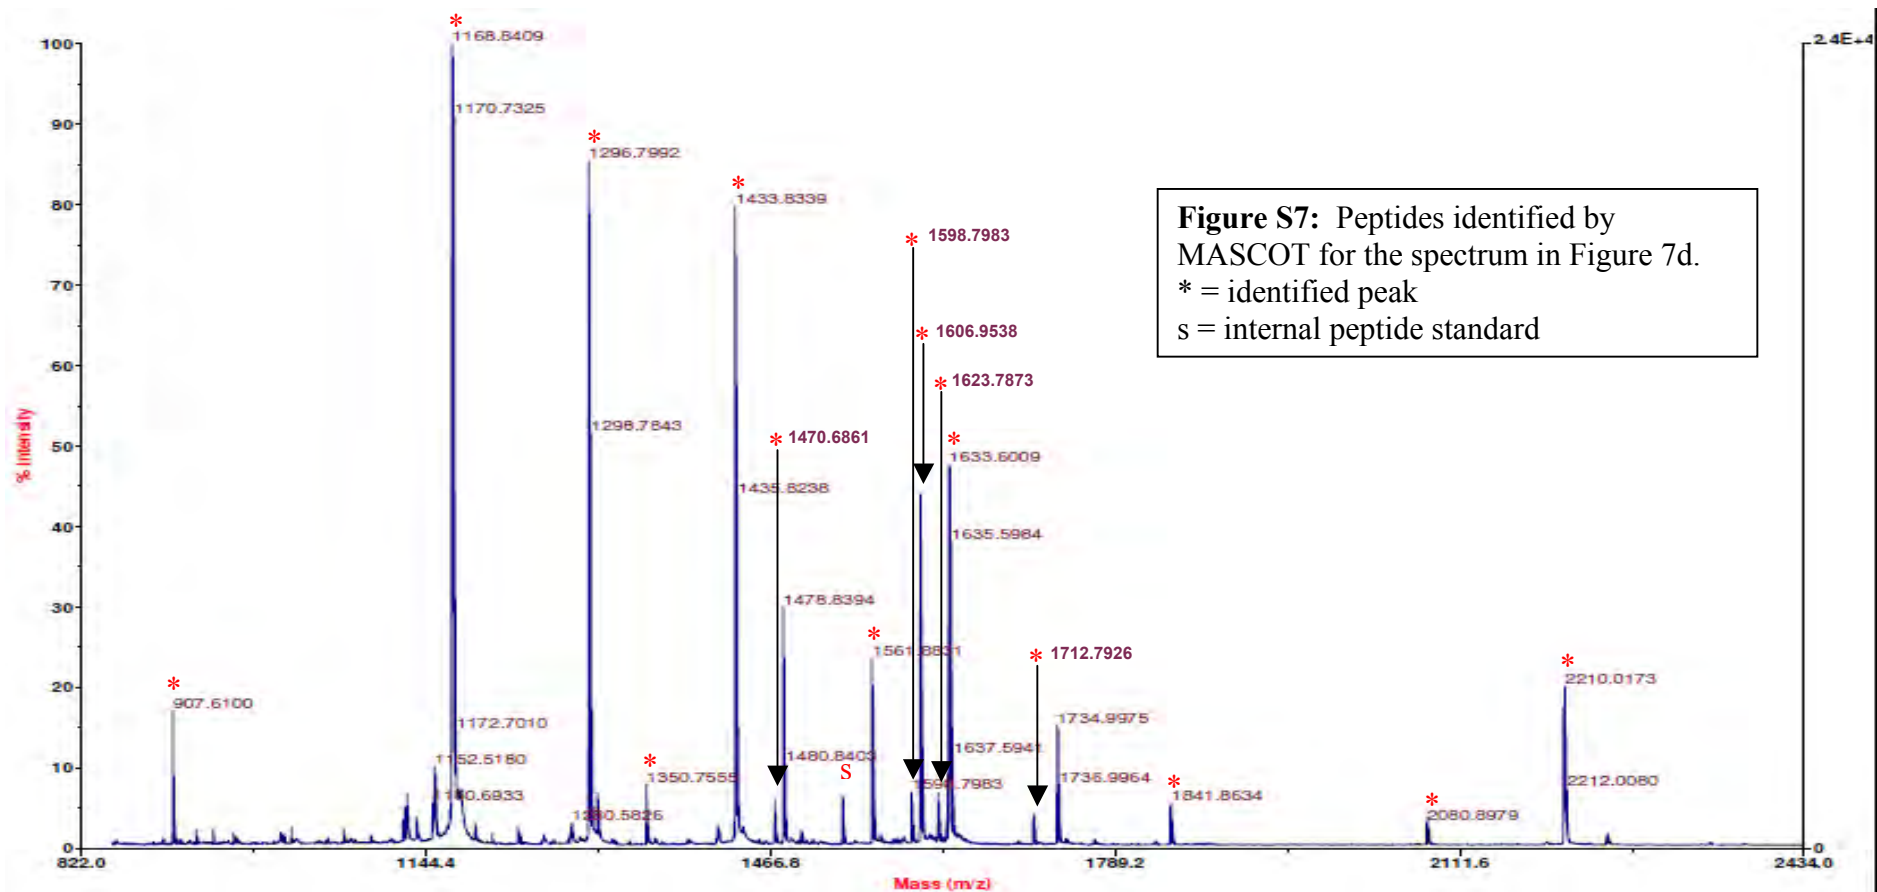

| Start - End | Observed  | Mr (expt) | Mr (calc) | ppm  | Miss Sequence                   |
|-------------|-----------|-----------|-----------|------|---------------------------------|
| 10 - 23     | 1633.6009 | 1632.5936 | 1632.8116 | -134 | 1 <b>K.IFVQKCAQCHTVEK.G</b>     |
| 27 - 39     | 1433.8339 | 1432.8266 | 1432.7688 | 40   | 1 <b>K.HKTGPNLHGLFGR.K</b>      |
| 27 - 40     | 1561.8831 | 1560.8758 | 1560.8637 | 8    | 2 <b>K.HKTGPNLHGLFGRK.T</b>     |
| 29 - 39     | 1168.8409 | 1167.8337 | 1167.6149 | 187  | 0 <b>K.TGPNLHGLFGR.K</b>        |
| 29 - 40     | 1296.7992 | 1295.7919 | 1295.7099 | 63   | 1 <b>K.TGPNLHGLFGRK.T</b>       |
| 40 - 54     | 1598.7983 | 1597.7910 | 1597.7736 | 11   | 1 <b>R.KTGQAPGFITYTDANK.N</b>   |
| 40 - 56     | 1840.8652 | 1839.8580 | 1839.9115 | -29  | 2 <b>R.KTGQAPGFITYTDANKNK.G</b> |
| 41 - 54     | 1470.6861 | 1469.6789 | 1469.6787 | 0    | 0 <b>K.TGQAPGFITYTDANK.N</b>    |
| 41 - 56     | 1712.7926 | 1711.7853 | 1711.8166 | -18  | 1 <b>K.TGQAPGFITYTDANKNK.G</b>  |
| 57 - 73     | 2080.8979 | 2079.8907 | 2080.0186 | -62  | 1 <b>K.GITWKEETLMEYLENPK.K</b>  |
| 57 - 74     | 2209.0137 | 2208.0064 | 2208.1136 | -49  | 2 <b>K.GITWKEETLMEYLENPKK.Y</b> |
| 62 - 74     | 1623.7873 | 1622.7800 | 1622.7861 | -4   | 1 <b>K.EETLMEYLENPKK.Y</b>      |
| 81 - 88     | 907.6100  | 906.6027  | 906.5361  | 74   | 1 <b>K.MIFAGIKK.K</b>           |
| 89 - 101    | 1606.9538 | 1605.9465 | 1605.9090 | 23   | 3 <b>K.KTEREDLIAYLKK.A</b>      |
| 90 - 100    | 1350.7555 | 1349.7482 | 1349.7190 | 22   | 1 <b>K.TEREDLIAYLK.K</b>        |

**CYC\_HORSE Score: 251** Expect: 4.2e-20  
 Cytochrome c OS=Equus caballus GN=CYCS PE=1 SV=2  
 Nominal mass (Mr): 11825; Calculated pI value: 9.59  
 NCBI BLAST search of CYC\_HORSE against nr  
 Unformatted sequence string for pasting into other applications

Taxonomy: Equus caballus  
 Cleavage by Trypsin: cuts C-term side of KR unless next residue is P  
 Number of mass values searched: 15  
 Number of mass values matched: 15  
 Sequence Coverage: 79%  
 Matched peptides shown in Bold Red



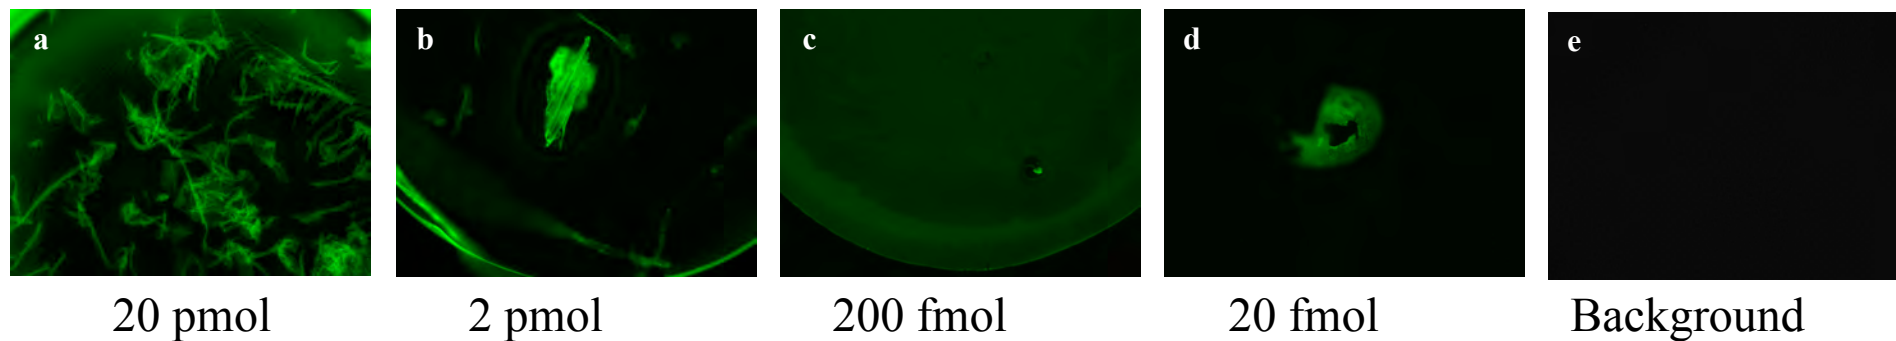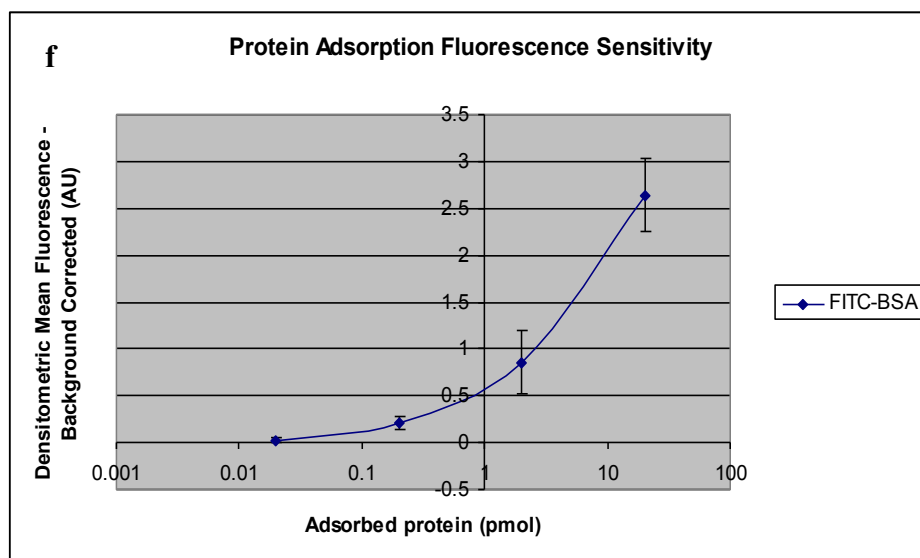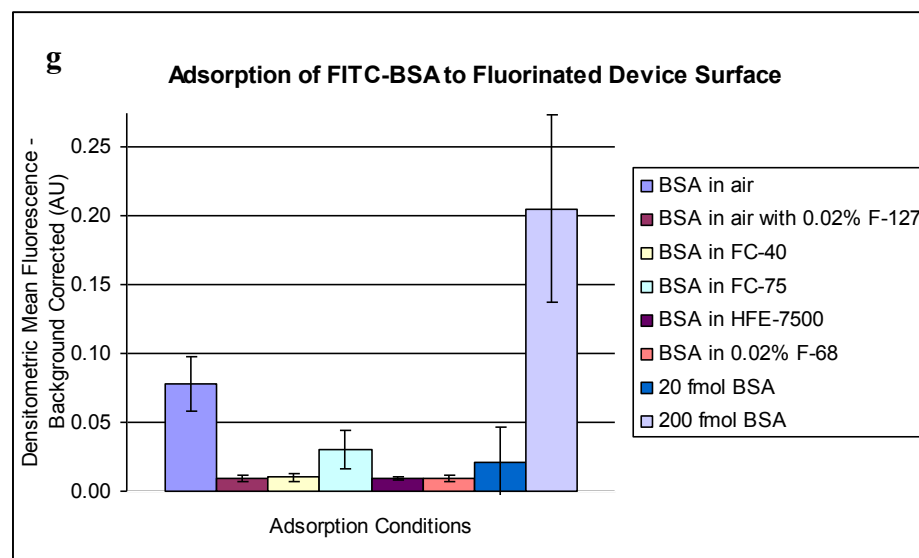

**Figure S8.** (a – e) Fluorescence images showing adsorption of known amounts of protein to the hydrophobic surface of the device. To determine the sensitivity of fluorescence microscopy for detecting FITC-BSA adsorbed to the device surface 2  $\mu$ L drops of various, known concentrations were deposited onto a Teflon® coated surface and allowed to dry. The dried protein spots were then imaged by fluorescence microscopy. (f) The sensitivity analysis reveals that as little as 20 fmol of protein is readily detected using fluorescence microscopy. (g) Figure 4 with the addition of fluorescence intensity data for 20 and 200 fmol of adsorbed FITC-BSA (data added as the rightmost columns). The addition of Pluronics®, or engulfing the droplets in fluorinated liquids, reduces the adsorption of proteins substantially compared to a droplet without surfactant additives sitting in air (leftmost column); protein adsorption is reduced to 20 fmol or less.
